# Supplementary material
Source: Springer Nature journal article supplement (https://www.springermedizin.de/resource/supplementary/12958_2009_596_MOESM7_ESM.pdf/9568058)

Uterine wet weight (mg)

60  
50  
40  
30  
20  
10  
0

Sal-Sal

Dex-Sal

Sal-E<sub>2</sub>

Dex-E<sub>2</sub>

Treatment

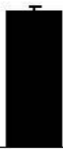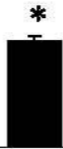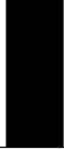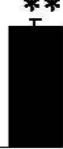

Supplement: MOESM7 [file 9568058]
